# Supplementary material for: Metabolomics Reveals Strain-Specific Cyanopeptide Profiles and Their Production Dynamics in Microcystis aeruginosa and M. flos-aquae
Source: MDPI journal article supplement (doi:10.3390/toxins15040254), 2023-03-31
Supplement: s1 [file s1]

**Table S1.** Collection and specific growth rate information for studied *Microcystis* strains in BG-11.

| Strain                        | Collection Data |                                |
|-------------------------------|-----------------|--------------------------------|
|                               | Date            | Location                       |
| <i>M. aeruginosa</i> CPCC 299 | 08/90           | Pretzlaff Pond, AB, Canada     |
| <i>M. aeruginosa</i> CPCC 300 | 08/90           | Pretzlaff Pond, AB, Canada     |
| <i>M. flos-aquae</i> CPCC 461 | 08/75           | Fox River, WI, USA             |
| <i>M. aeruginosa</i> CPCC 632 | 10/48           | Lake Mendota, WI, USA          |
| <i>M. aeruginosa</i> CPCC 633 | 10/54           | Little Rideau Lake, ON, Canada |

**Table S2.** The peak picking parameters used with the bioinformatics package *xcms*.

| Parameter | Polarity | Scan Pre-Filter *                | <i>m/z</i> Deviation (ppm) | s/n Ratio Cutoff | Peak width Range (secs) | Noise Level |
|-----------|----------|----------------------------------|----------------------------|------------------|-------------------------|-------------|
| Set point | +        | 5 with minimum intensity of 5000 | 1                          | 5                | 12–15                   | 500,000     |

\* Number of scans a metabolite must be present in with a minimum intensity of 5000.

**Table S3.** Cyanopeptide groups produced by *M. aeruginosa* CPCC 299, 300, 632 and 633, and *M. flos-aquae* CPCC 461.

| Cyanopeptide Group | <i>Microcystis</i> Strain (CPCC) |     |     |     |     |
|--------------------|----------------------------------|-----|-----|-----|-----|
|                    | 299                              | 300 | 632 | 633 | 461 |
| Microcystin        | +                                | +   |     |     |     |
| Anabaenopeptin     |                                  |     | +   | +   |     |
| Microginin         |                                  |     | +   | +   |     |
| Cyanopeptolin      | +                                | +   | +   | +   |     |
| Cyanobactin        | +                                | +   |     | +   | +   |
| Aeruginosin        |                                  | +   | +   |     |     |
| Microviridin       | +                                |     | +   | +   |     |

**Table S4.** HRMS data for cyanopeptide produced by *M. aeruginosa* CPCC 299, 300, 632 and 633, and *M. flos-aquae* CPCC 461 identified in the GNPS analysis.

| Cluster # | Cyanotoxin group | Name     | <i>m/z</i>                                   | Formula                                                           | $\delta$ (ppm) | Rt (min) | <i>Microcystis</i> CPCC strain |     |     |     |     | Reference  |
|-----------|------------------|----------|----------------------------------------------|-------------------------------------------------------------------|----------------|----------|--------------------------------|-----|-----|-----|-----|------------|
|           |                  |          |                                              |                                                                   |                |          | 299                            | 300 | 461 | 632 | 633 |            |
| 1         | Cyanopeptolin    | Cyp 904  | 887.4652 [M+H-H <sub>2</sub> O] <sup>+</sup> | C <sub>46</sub> H <sub>64</sub> N <sub>8</sub> O <sub>11</sub>    | −1.08          | 4.20     | +                              |     |     | +   |     | This study |
| 1         | Cyanopeptolin    | Cyp 920  | 903.4367 [M+H-H <sub>2</sub> O] <sup>+</sup> | C <sub>43</sub> H <sub>65</sub> N <sub>8</sub> O <sub>12</sub> Cl | −1.37          | 3.40     |                                |     |     | +   |     | This study |
| 1         | Cyanopeptolin    | NP BN920 | 903.4587 [M+H-H <sub>2</sub> O] <sup>+</sup> | C <sub>46</sub> H <sub>64</sub> N <sub>8</sub> O <sub>12</sub>    | 0.10           | 3.25     |                                |     |     | +   |     | [73]       |
| 1         | Cyanopeptolin    | Cyp 932  | 915.4972 [M+H-H <sub>2</sub> O] <sup>+</sup> | C <sub>48</sub> H <sub>68</sub> N <sub>8</sub> O <sub>11</sub>    | −0.29          | 4.85     |                                |     |     |     | +   | This study |
| 1         | Cyanopeptolin    | Cyp 940  | 923.4039 [M+H-H <sub>2</sub> O] <sup>+</sup> | C <sub>45</sub> H <sub>65</sub> N <sub>8</sub> O <sub>12</sub> Cl | −0.45          | 3.38     |                                |     |     | +   |     | This study |
| 1         | Cyanopeptolin    | Cyp 946  | 929.5116 [M+H-H <sub>2</sub> O] <sup>+</sup> | C <sub>49</sub> H <sub>70</sub> N <sub>8</sub> O <sub>11</sub>    | −1.63          | 5.19     |                                |     |     |     | +   | This study |
| 1         | Cyanopeptolin    | Cyp 954  | 937.4217 [M+H-H <sub>2</sub> O] <sup>+</sup> | C <sub>46</sub> H <sub>63</sub> N <sub>8</sub> O <sub>12</sub> Cl | −0.43          | 3.51     |                                |     |     | +   |     | [73]       |
| 1         | Cyanopeptolin    | Cyp 954B | 937.4441 [M+H-H <sub>2</sub> O] <sup>+</sup> | C <sub>49</sub> H <sub>62</sub> N <sub>8</sub> O <sub>12</sub>    | −1.41          | 4.16     | +                              |     |     | +   |     | This study |
| 1         | Cyanopeptolin    | Cyp 966  | 949.4821 [M+H-H <sub>2</sub> O] <sup>+</sup> | C <sub>51</sub> H <sub>66</sub> N <sub>8</sub> O <sub>11</sub>    | 0.29           | 5.00     | +                              |     |     |     | +   | This study |
| 1         | Cyanopeptolin    | Cyp 968  | 951.4596 [M+H-H <sub>2</sub> O] <sup>+</sup> | C <sub>50</sub> H <sub>64</sub> N <sub>8</sub> O <sub>12</sub>    | −1.55          | 3.96     |                                |     |     | +   | +   | This study |
| 1         | Cyanopeptolin    | Cyp 980  | 963.4964 [M+H-H <sub>2</sub> O] <sup>+</sup> | C <sub>52</sub> H <sub>68</sub> N <sub>8</sub> O <sub>11</sub>    | −1.04          | 5.31     |                                |     |     |     | +   | This study |
| 1         | Cyanopeptolin    | Cyp 982  | 965.4525 [M+H-H <sub>2</sub> O] <sup>+</sup> | C <sub>48</sub> H <sub>67</sub> N <sub>8</sub> O <sub>12</sub> Cl | 1.19           | 4.02     |                                |     |     | +   |     | This study |
| 1         | Cyanopeptolin    | Cyp 992  | 979.4930 [M+H-H <sub>2</sub> O] <sup>+</sup> | C <sub>52</sub> H <sub>68</sub> N <sub>8</sub> O <sub>12</sub>    | 0.73           | 4.79     |                                |     |     |     | +   | This study |
| 1         | Cyanopeptolin    | Cyp 1010 | 993.4856 [M+H-H <sub>2</sub> O] <sup>+</sup> | C <sub>50</sub> H <sub>71</sub> N <sub>8</sub> O <sub>12</sub> Cl | 0.08           | 4.97     |                                |     |     | +   | +   | This study |
| 1         | Cyanopeptolin    | Cyp 999  | 1000.5120 [M+H] <sup>+</sup>                 | C <sub>51</sub> H <sub>69</sub> N <sub>9</sub> O <sub>12</sub>    | −1.34          | 3.90     | +                              |     |     |     |     | This study |
| 2         | Cyanopeptolin    | Cyp 900  | 901.5031 [M+H] <sup>+</sup>                  | C <sub>44</sub> H <sub>68</sub> N <sub>8</sub> O <sub>12</sub>    | 0.17           | 3.17     |                                | +   |     |     |     | This study |
| 2         | Cyanopeptolin    | Cyp B    | 929.5327 [M+H] <sup>+</sup>                  | C <sub>46</sub> H <sub>72</sub> N <sub>8</sub> O <sub>12</sub>    | −1.66          | 3.69     |                                | +   |     |     |     | [30]       |
| 2         | Cyanopeptolin    | Cyp C    | 943.5481 [M+H] <sup>+</sup>                  | C <sub>47</sub> H <sub>74</sub> N <sub>8</sub> O <sub>12</sub>    | −1.90          | 3.70     |                                | +   |     |     |     | [30]       |
| 2         | Cyanopeptolin    | Cyp 945  | 946.4917 [M+H] <sup>+</sup>                  | C <sub>49</sub> H <sub>67</sub> N <sub>7</sub> O <sub>12</sub>    | −0.36          | 5.35     |                                | +   |     |     |     | This study |
| 2         | Cyanopeptolin    | Cyp A    | 957.5391 [M+H] <sup>+</sup>                  | C <sub>46</sub> H <sub>72</sub> N <sub>10</sub> O <sub>12</sub>   | −1.35          | 3.75     |                                | +   |     |     |     | [30]       |
| 2         | Cyanopeptolin    | Cyp 963A | 964.5040 [M+H] <sup>+</sup>                  | C <sub>49</sub> H <sub>69</sub> N <sub>7</sub> O <sub>13</sub>    | 1.53           | 5.31     |                                | +   |     |     |     | [34]       |
| 2         | Cyanopeptolin    | Cyp 970  | 971.5565 [M+H] <sup>+</sup>                  | C <sub>47</sub> H <sub>74</sub> N <sub>10</sub> O <sub>12</sub>   | 0.46           | 4.14     |                                | +   |     |     |     | This study |
| 2         | Cyanopeptolin    | Cyp 984  | 985.5725 [M+H] <sup>+</sup>                  | C <sub>48</sub> H <sub>76</sub> N <sub>10</sub> O <sub>12</sub>   | 0.61           | 4.72     |                                | +   |     |     |     | This study |

|   |              |                                                  |                               |                                                                  |       |      |   |   |   |   |            |
|---|--------------|--------------------------------------------------|-------------------------------|------------------------------------------------------------------|-------|------|---|---|---|---|------------|
| 3 | Microviridin | Mv 1630                                          | 816.4052 [M+2H] <sup>2+</sup> | C <sub>72</sub> H <sub>112</sub> N <sub>17</sub> O <sub>26</sub> | −0.35 | 2.81 |   |   | + | + | This study |
| 3 | Microviridin | Mv 1651                                          | 826.9047 [M+2H] <sup>2+</sup> | C <sub>86</sub> H <sub>107</sub> N <sub>16</sub> O <sub>18</sub> | −0.02 | 2.70 | + |   | + |   | This study |
| 3 | Microviridin | Mv 1669                                          | 835.9076 [M+2H] <sup>2+</sup> | C <sub>80</sub> H <sub>113</sub> N <sub>14</sub> O <sub>25</sub> | 0.36  | 2.79 | + |   |   |   | This study |
| 3 | Microviridin | Mv 1804                                          | 903.4258 [M+2H] <sup>2+</sup> | C <sub>88</sub> H <sub>114</sub> N <sub>19</sub> O <sub>23</sub> | 2.00  | 2.80 | + |   | + |   | This study |
| 3 | Microviridin | Mv 1856                                          | 922.3999 [M+2H] <sup>2+</sup> | C <sub>87</sub> H <sub>112</sub> N <sub>17</sub> O <sub>28</sub> | −0.55 | 2.81 | + |   | + |   | This study |
| 3 | Microviridin | Mv 1850                                          | 926.4323 [M+2H] <sup>2+</sup> | C <sub>93</sub> H <sub>116</sub> N <sub>19</sub> O <sub>22</sub> | −2.18 | 2.86 |   |   |   | + | This study |
| 3 | Microviridin | Mv 1858                                          | 930.4302 [M+2H] <sup>2+</sup> | C <sub>91</sub> H <sub>116</sub> N <sub>19</sub> O <sub>24</sub> | 1.13  | 2.87 | + |   | + |   | This study |
| 3 | Microviridin | Mv 1874                                          | 938.4132 [M+2H] <sup>2+</sup> | C <sub>88</sub> H <sub>116</sub> N <sub>17</sub> O <sub>29</sub> | −1.75 | 2.89 |   |   | + |   | This study |
| 4 | Microviridin | Mv 1567                                          | 784.8342 [M+2H] <sup>2+</sup> | C <sub>80</sub> H <sub>91</sub> N <sub>14</sub> O <sub>20</sub>  | 0.31  | 3.21 | + |   |   | + | This study |
| 4 | Microviridin | Mv 1589                                          | 800.3928 [M+2H] <sup>2+</sup> | C <sub>71</sub> H <sub>109</sub> N <sub>17</sub> O <sub>25</sub> | 0.61  | 2.64 |   |   | + | + | This study |
| 4 | Microviridin | Mv J                                             | 842.8925 [M+2H] <sup>2+</sup> | C <sub>80</sub> H <sub>105</sub> N <sub>19</sub> O <sub>22</sub> | 1.31  | 2.75 | + |   | + |   | [41]       |
| 4 | Microviridin | Mv 1715                                          | 858.9321 [M+2H] <sup>2+</sup> | C <sub>88</sub> H <sub>115</sub> N <sub>16</sub> O <sub>20</sub> | 1.36  | 2.90 | + |   | + |   | This study |
| 4 | Microviridin | Mv 1822                                          | 912.4276 [M+2H] <sup>2+</sup> | C <sub>88</sub> H <sub>116</sub> N <sub>19</sub> O <sub>24</sub> | −1.87 | 2.80 | + |   | + |   | This study |
| 4 | Microviridin | Mv H                                             | 919.4114 [M+2H] <sup>2+</sup> | C <sub>89</sub> H <sub>114</sub> N <sub>17</sub> O <sub>26</sub> | −2.11 | 2.87 | + |   | + | + | [74]       |
| 5 | Microviridin | Mv 1459                                          | 730.8624 [M+2H] <sup>2+</sup> | C <sub>82</sub> H <sub>91</sub> N <sub>16</sub> O <sub>10</sub>  | −0.15 | 2.44 | + |   |   | + | This study |
| 5 | Microviridin | Mv 1612                                          | 807.4003 [M+2H] <sup>2+</sup> | C <sub>72</sub> H <sub>111</sub> N <sub>17</sub> O <sub>25</sub> | 0.06  | 2.80 |   |   |   | + | This study |
| 5 | Microviridin | Mv 1790                                          | 896.4191 [M+2H] <sup>2+</sup> | C <sub>80</sub> H <sub>116</sub> N <sub>19</sub> O <sub>28</sub> | 0.06  | 2.64 | + |   | + |   | This study |
| 5 | Microviridin | Mv 1826                                          | 914.4168 [M+2H] <sup>2+</sup> | C <sub>90</sub> H <sub>112</sub> N <sub>19</sub> O <sub>23</sub> | 0.66  | 2.81 | + |   | + |   | This study |
| 6 | Microcystin  | [Asp <sup>3</sup> , Dha <sup>7</sup> ]-<br>MC-LR | 967.5254 [M+H] <sup>+</sup>   | C <sub>47</sub> H <sub>70</sub> N <sub>10</sub> O <sub>12</sub>  | −1.69 | 3.29 | + | + |   |   | [13]       |
| 6 | Microcystin  | [Asp <sup>3</sup> ]-MC-<br>LR                    | 981.5385 [M+H] <sup>+</sup>   | C <sub>48</sub> H <sub>72</sub> N <sub>10</sub> O <sub>12</sub>  | −0.71 | 3.40 | + | + |   |   | [43]       |
| 6 | Microcystin  | MC-LR                                            | 995.5565 [M+H] <sup>+</sup>   | C <sub>49</sub> H <sub>74</sub> N <sub>10</sub> O <sub>12</sub>  | 1.76  | 3.49 | + | + |   |   | [43]       |
| 6 | Microcystin  | MC-1010                                          | 1011.5535 [M+H] <sup>+</sup>  | C <sub>49</sub> H <sub>74</sub> N <sub>10</sub> O <sub>13</sub>  | −0.41 | 3.37 | + | + |   |   |            |
| 7 | Microginin   | Mg 612                                           | 613.3225 [M+H] <sup>+</sup>   | C <sub>32</sub> H <sub>44</sub> N <sub>4</sub> O <sub>8</sub>    | −1.11 | 2.53 |   |   |   | + | [46]       |
| 7 | Microginin   | Mg 626                                           | 627.3374 [M+H] <sup>+</sup>   | C <sub>33</sub> H <sub>46</sub> N <sub>4</sub> O <sub>8</sub>    | 0.49  | 2.70 |   |   | + | + | This study |
| 7 | Microginin   | Mg 628                                           | 629.3184 [M+H] <sup>+</sup>   | C <sub>32</sub> H <sub>44</sub> N <sub>4</sub> O <sub>9</sub>    | 0.11  | 2.31 |   |   |   | + | This study |
| 7 | Microginin   | Mg 630                                           | 631.2891 [M+H] <sup>+</sup>   | C <sub>32</sub> H <sub>43</sub> N <sub>4</sub> O <sub>7</sub> Cl | −0.32 | 2.60 |   |   |   | + | This study |

|    |                |        |                                              |                                                                               |       |      |   |   |   |            |
|----|----------------|--------|----------------------------------------------|-------------------------------------------------------------------------------|-------|------|---|---|---|------------|
| 7  | Microginin     | Mg 640 | 641.3535 [M+H] <sup>+</sup>                  | C <sub>34</sub> H <sub>48</sub> N <sub>4</sub> O <sub>8</sub>                 | −1.54 | 2.75 |   | + | + | This study |
| 7  | Microginin     | Mg 646 | 647.2826 [M+H] <sup>+</sup>                  | C <sub>32</sub> H <sub>43</sub> N <sub>4</sub> O <sub>8</sub> Cl              | −2.22 | 2.56 |   |   | + | [46]       |
| 7  | Microginin     | Mg 660 | 661.2985 [M+H] <sup>+</sup>                  | C <sub>33</sub> H <sub>45</sub> N <sub>4</sub> O <sub>8</sub> Cl              | −1.66 | 2.70 |   | + | + | This study |
| 7  | Microginin     | Mg 664 | 665.2503 [M+H] <sup>+</sup>                  | C <sub>32</sub> H <sub>42</sub> N <sub>4</sub> O <sub>7</sub> Cl <sub>2</sub> | 0.41  | 3.04 |   |   | + | This study |
| 7  | Microginin     | Mg 674 | 675.3148 [M+H] <sup>+</sup>                  | C <sub>34</sub> H <sub>47</sub> N <sub>4</sub> O <sub>8</sub> Cl              | −1.06 | 2.72 |   | + | + | This study |
| 7  | Microginin     | Mg 680 | 681.2441 [M+H] <sup>+</sup>                  | C <sub>32</sub> H <sub>42</sub> N <sub>4</sub> O <sub>8</sub> Cl <sub>2</sub> | −1.44 | 2.65 |   |   | + | [46]       |
| 7  | Microginin     | Mg 694 | 695.2599 [M+H] <sup>+</sup>                  | C <sub>33</sub> H <sub>44</sub> N <sub>4</sub> O <sub>8</sub> Cl <sub>2</sub> | −0.39 | 2.89 |   |   | + | This study |
| 7  | Microginin     | Mg 714 | 715.2053 [M+H] <sup>+</sup>                  | C <sub>32</sub> H <sub>41</sub> N <sub>4</sub> O <sub>8</sub> Cl <sub>3</sub> | −1.36 | 2.86 |   | + | + | This study |
| 8  | Aeruginosamide | Ag 560 | 561.2522 [M+H] <sup>+</sup>                  | C <sub>31</sub> H <sub>36</sub> N <sub>4</sub> O <sub>4</sub> S               | −0.68 | 2.97 |   |   | + | This study |
| 8  | Aeruginosamide | Ag 562 | 563.2695 [M+H] <sup>+</sup>                  | C <sub>31</sub> H <sub>38</sub> N <sub>4</sub> O <sub>4</sub> S               | −1.86 | 3.09 |   |   | + | This study |
| 8  | Aeruginosamide | Ag B   | 575.2678 [M+H] <sup>+</sup>                  | C <sub>32</sub> H <sub>39</sub> N <sub>4</sub> O <sub>4</sub> S               | 0.43  | 3.55 | + | + | + | [49]       |
| 8  | Aeruginosamide | Ag 590 | 591.2635 [M+H] <sup>+</sup>                  | C <sub>32</sub> H <sub>38</sub> N <sub>4</sub> O <sub>5</sub> S               | −0.28 | 3.08 |   |   | + | This study |
| 8  | Aeruginosamide | Ag 661 | 660.3217 [M+H] <sup>+</sup>                  | C <sub>36</sub> H <sub>46</sub> N <sub>5</sub> O <sub>5</sub> S               | 0.08  | 3.16 |   |   | + | This study |
| 8  | Aeruginosamide | Ag C   | 674.3357 [M+H] <sup>+</sup>                  | C <sub>37</sub> H <sub>47</sub> N <sub>5</sub> O <sub>5</sub> S               | 0.79  | 3.85 |   |   | + | [49]       |
| 8  | Aeruginosamide | Ag 689 | 690.3328 [M+H] <sup>+</sup>                  | C <sub>37</sub> H <sub>47</sub> N <sub>5</sub> O <sub>6</sub> S               | 1.18  | 3.56 |   |   | + | This study |
| 9  | Anabaenopeptin | AP D   | 828.4298 [M+H] <sup>+</sup>                  | C <sub>44</sub> H <sub>57</sub> N <sub>7</sub> O <sub>9</sub>                 | −0.06 | 3.91 |   | + | + | [57]       |
| 9  | Anabaenopeptin | AP 850 | 851.4453 [M+H] <sup>+</sup>                  | C <sub>46</sub> H <sub>58</sub> N <sub>8</sub> O <sub>8</sub>                 | −0.10 | 4.97 |   | + | + | This study |
| 9  | Anabaenopeptin | AP 857 | 858.4381 [M+H] <sup>+</sup>                  | C <sub>45</sub> H <sub>59</sub> N <sub>7</sub> O <sub>10</sub>                | −1.82 | 3.44 |   | + | + | [57]       |
| 9  | Anabaenopeptin | FA A   | 867.4378 [M+H] <sup>+</sup>                  | C <sub>46</sub> H <sub>58</sub> N <sub>8</sub> O <sub>9</sub>                 | −1.44 | 3.93 |   | + | + | [57]       |
| 9  | Anabaenopeptin | FA B   | 881.4552 [M+H] <sup>+</sup>                  | C <sub>47</sub> H <sub>60</sub> N <sub>8</sub> O <sub>9</sub>                 | 1.13  | 4.18 |   | + | + | [57]       |
| 9  | Anabaenopeptin | AP 882 | 883.4334 [M+H] <sup>+</sup>                  | C <sub>46</sub> H <sub>58</sub> N <sub>8</sub> O <sub>10</sub>                | −1.66 | 3.46 |   | + | + | This study |
| 10 | Aeruginosin    | As 722 | 643.2986 [M+H-SO <sub>3</sub> ] <sup>+</sup> | C <sub>32</sub> H <sub>43</sub> N <sub>6</sub> O <sub>9</sub> SCl             | −1.38 | 2.60 |   | + |   | This study |
| 10 | Aeruginosin    | As 688 | 689.2947 [M+H] <sup>+</sup>                  | C <sub>32</sub> H <sub>44</sub> N <sub>6</sub> O <sub>9</sub> S               | −1.34 | 2.50 |   | + |   | This study |
| 11 | Aeruginosin    | As 650 | 651.3141 [M+H] <sup>+</sup>                  | C <sub>33</sub> H <sub>42</sub> N <sub>6</sub> O <sub>6</sub>                 | 0.70  | 2.24 | + |   |   | This study |
| 11 | Aeruginosin    | As 684 | 685.2750 [M+H] <sup>+</sup>                  | C <sub>33</sub> H <sub>41</sub> N <sub>6</sub> O <sub>6</sub> Cl              | 0.63  | 2.34 | + |   |   | This study |
| 11 | Aeruginosin    | As 734 | 717.3002 [M+H-H <sub>2</sub> O] <sup>+</sup> | C <sub>29</sub> H <sub>46</sub> N <sub>6</sub> O <sub>7</sub> Cl <sub>2</sub> | 0.98  | 2.44 | + |   |   | This study |
| 12 | Cyanobactin    | Md A   | 583.1901 [M+H] <sup>+</sup>                  | C <sub>26</sub> H <sub>30</sub> N <sub>8</sub> O <sub>4</sub> S <sub>2</sub>  | 0.85  | 3.15 |   | + |   | [35]       |
| 12 | Cyanobactin    | Md 584 | 585.2058 [M+H] <sup>+</sup>                  | C <sub>26</sub> H <sub>32</sub> N <sub>8</sub> O <sub>4</sub> S <sub>2</sub>  | −0.03 | 2.96 | + | + |   | This study |

|    |             |          |                                              |                                                                                 |       |      |   |   |   |   |            |            |            |
|----|-------------|----------|----------------------------------------------|---------------------------------------------------------------------------------|-------|------|---|---|---|---|------------|------------|------------|
| 12 | Cyanobactin | Md 586   | 587.2216 [M+H] <sup>+</sup>                  | C <sub>26</sub> H <sub>34</sub> N <sub>8</sub> O <sub>4</sub> S <sub>2</sub>    | −0.20 | 3.84 | + |   | + |   | This study |            |            |
| 13 | Cyanobactin | Ac C     | 517.2235 [M+H] <sup>+</sup>                  | C <sub>24</sub> H <sub>32</sub> N <sub>6</sub> O <sub>5</sub> S                 | 1.42  | 5.85 | + | + |   |   | [35]       |            |            |
| 13 | Cyanobactin | Ac 518   | 519.2385 [M+H] <sup>+</sup>                  | C <sub>24</sub> H <sub>34</sub> N <sub>6</sub> O <sub>5</sub> S                 | −0.89 | 5.77 |   |   | + |   | This study |            |            |
| 13 | Cyanobactin | Ac B     | 533.2006 [M+H] <sup>+</sup>                  | C <sub>24</sub> H <sub>32</sub> N <sub>6</sub> O <sub>4</sub> S <sub>2</sub>    | 1.27  | 5.82 |   |   | + |   | [53]       |            |            |
| 13 | Cyanobactin | Ac A     | 535.2161 [M+H] <sup>+</sup>                  | C <sub>24</sub> H <sub>34</sub> N <sub>6</sub> O <sub>4</sub> S <sub>2</sub>    | 0.98  | 5.78 | + |   | + |   | [53]       |            |            |
|    | Cyanobactin | Ac D     | 587.1562 [M+H] <sup>+</sup>                  | C <sub>26</sub> H <sub>30</sub> N <sub>6</sub> O <sub>4</sub> S <sub>3</sub>    | −0.37 | 5.12 |   |   | + |   | [35]       |            |            |
| 14 | Not defined | Unk 1448 | 725.3962 [M+2H] <sup>2+</sup>                | C <sub>73</sub> H <sub>106</sub> N <sub>15</sub> O <sub>14</sub> S              | 1.02  | 5.38 | + |   |   | + | This study |            |            |
| 14 | Not defined | Unk 1461 | 731.4159 [M+2H] <sup>2+</sup>                | C <sub>68</sub> H <sub>114</sub> N <sub>15</sub> O <sub>18</sub> S              | −0.92 | 5.81 | + |   |   | + | This study |            |            |
| 14 | Not defined | Unk 1462 | 732.4059 [M+2H] <sup>2+</sup>                | C <sub>70</sub> H <sub>110</sub> N <sub>16</sub> O <sub>16</sub> S              | −2.16 | 5.50 | + |   |   | + | This study |            |            |
| 14 | Not defined | Unk 1474 | 738.4238 [M+2H] <sup>2+</sup>                | C <sub>69</sub> H <sub>116</sub> N <sub>15</sub> O <sub>18</sub> S              | −0.75 | 5.81 | + |   |   | + | This study |            |            |
| 14 | Not defined | Unk 1476 | 739.4133 [M+2H] <sup>2+</sup>                | C <sub>71</sub> H <sub>112</sub> N <sub>16</sub> O <sub>16</sub> S              | −1.42 | 5.61 | + |   |   | + | This study |            |            |
| 14 | Not defined | Unk 1488 | 745.4307 [M+2H] <sup>2+</sup>                | C <sub>70</sub> H <sub>118</sub> N <sub>15</sub> O <sub>18</sub> S              | −2.07 | 5.91 | + |   |   | + | This study |            |            |
| 14 | Not defined | Unk 1490 | 746.4202 [M+2H] <sup>2+</sup>                | C <sub>72</sub> H <sub>114</sub> N <sub>16</sub> O <sub>16</sub> S              | −1.69 | 5.56 | + |   |   | + | This study |            |            |
| 14 | Not defined | Unk 1504 | 753.4296 [M+2H] <sup>2+</sup>                | C <sub>73</sub> H <sub>116</sub> N <sub>16</sub> O <sub>16</sub> S              | −1.95 | 5.69 | + |   |   | + | This study |            |            |
| 14 | Not defined | Unk 1508 | 755.4265 [M+2H] <sup>2+</sup>                | C <sub>73</sub> H <sub>118</sub> N <sub>15</sub> O <sub>15</sub> S <sub>2</sub> | 0.67  | 5.41 | + |   |   | + | This study |            |            |
| 14 | Not defined | Unk 1522 | 762.4341 [M+2H] <sup>2+</sup>                | C <sub>74</sub> H <sub>120</sub> N <sub>15</sub> O <sub>15</sub> S <sub>2</sub> | 0.74  | 5.57 | + |   |   | + | This study |            |            |
| 15 | Not defined | Unk 676  | 659.3628 [M+H-H <sub>2</sub> O] <sup>+</sup> | C <sub>30</sub> H <sub>48</sub> N <sub>10</sub> O <sub>8</sub>                  | −0.11 | 5.75 |   |   | + | + | +          | This study |            |
| 15 | Not defined | Unk 678  | 661.3791 [M+H-H <sub>2</sub> O] <sup>+</sup> | C <sub>30</sub> H <sub>50</sub> N <sub>10</sub> O <sub>8</sub>                  | 0.12  | 5.94 |   |   | + | + | +          | This study |            |
| 15 | Not defined | Unk 816  | 799.4315 [M+H-H <sub>2</sub> O] <sup>+</sup> | C <sub>35</sub> H <sub>56</sub> N <sub>14</sub> O <sub>9</sub>                  | −0.82 | 6.12 |   |   |   | + | +          | This study |            |
| 16 | Not defined | Unk 3314 | 1105.9709 [M+3H] <sup>3+</sup>               | C <sub>188</sub> H <sub>247</sub> N <sub>27</sub> O <sub>27</sub>               | 2.34  | 6.05 | + |   |   | + | +          | This study |            |
| 16 | Not defined | Unk 3316 | 1106.6386 [M+3H] <sup>3+</sup>               | C <sub>188</sub> H <sub>249</sub> N <sub>27</sub> O <sub>27</sub>               | −0.05 | 5.84 |   |   |   | + | +          | This study |            |
| 16 | Not defined | Unk 3953 | 1318.7494 [M+3H] <sup>3+</sup>               | C <sub>198</sub> H <sub>297</sub> N <sub>41</sub> O <sub>44</sub>               | 0.01  | 6.05 |   |   |   | + | +          | This study |            |
| 17 | Not defined | Unk 612  | 613.3250 [M+H] <sup>+</sup>                  | C <sub>32</sub> H <sub>44</sub> N <sub>4</sub> O <sub>8</sub>                   | 2.96  | 2.95 |   |   |   | + |            | This study |            |
| 17 | Not defined | Unk 692  | 693.2809 [M+H] <sup>+</sup>                  | C <sub>32</sub> H <sub>44</sub> N <sub>4</sub> O <sub>11</sub> S                | 1.34  | 3.03 |   |   |   | + |            | This study |            |
| 17 | Not defined | Unk 794  | 795.2213 [M+H] <sup>+</sup>                  | C <sub>34</sub> H <sub>42</sub> N <sub>4</sub> O <sub>15</sub> S <sub>2</sub>   | −0.05 | 3.00 |   |   |   | + |            | This study |            |
| 17 | Not defined | Unk 810  | 811.1867 [M+H] <sup>+</sup>                  | C <sub>40</sub> H <sub>35</sub> N <sub>4</sub> O <sub>13</sub> S                | −2.61 | 3.02 |   |   |   | + |            | This study |            |
| 18 | Not defined | Unk 1013 | 1014.6271 [M+H] <sup>+</sup>                 | C <sub>56</sub> H <sub>83</sub> N <sub>7</sub> O <sub>10</sub>                  | −0.27 | 6.04 |   |   |   |   | +          | +          | This study |
| 18 | Not defined | Unk 1029 | 1030.6211 [M+H] <sup>+</sup>                 | C <sub>56</sub> H <sub>83</sub> N <sub>7</sub> O <sub>11</sub>                  | 0.22  | 5.91 |   |   |   |   | +          | +          | This study |

|    |             |         |                                              |                                                                 |       |      |   |   |   |   |   |   |            |
|----|-------------|---------|----------------------------------------------|-----------------------------------------------------------------|-------|------|---|---|---|---|---|---|------------|
| 19 | Not defined | Unk 359 | 360.1929 [M+H] <sup>+</sup>                  | C <sub>19</sub> H <sub>25</sub> N <sub>3</sub> O <sub>4</sub>   | 2.82  | 2.33 | + |   |   |   |   |   | This study |
| 19 | Not defined | Unk 559 | 560.2925 [M+H] <sup>+</sup>                  | C <sub>24</sub> H <sub>41</sub> N <sub>5</sub> O <sub>10</sub>  | −0.21 | 2.20 | + |   |   |   |   |   | This study |
| 20 | Not defined | Unk 608 | 609.4340 [M+H] <sup>+</sup>                  | C <sub>31</sub> H <sub>56</sub> N <sub>6</sub> O <sub>6</sub>   | 1.00  | 6.22 |   | + |   |   |   |   | This study |
| 20 | Not defined | Unk 622 | 623.4494 [M+H] <sup>+</sup>                  | C <sub>32</sub> H <sub>58</sub> N <sub>6</sub> O <sub>6</sub>   | 0.64  | 6.24 |   | + |   |   |   |   | This study |
| 21 | Not defined | Unk 495 | 513.3036 [M+NH <sub>4</sub> ] <sup>+</sup>   | C <sub>23</sub> H <sub>40</sub> N <sub>6</sub> O <sub>7</sub>   | 1.02  | 6.25 |   |   |   | + | + |   | This study |
| 21 | Not defined | Unk 674 | 692.3845 [M+NH <sub>4</sub> ] <sup>+</sup>   | C <sub>25</sub> H <sub>46</sub> N <sub>12</sub> O <sub>10</sub> | −0.80 | 5.49 | + | + | + | + | + |   | This study |
| 22 | Not defined | Unk 669 | 670.4092 [M+NH <sub>4</sub> ] <sup>+</sup>   | C <sub>38</sub> H <sub>51</sub> N <sub>7</sub> O <sub>4</sub>   | 2.28  | 5.62 | + |   | + |   |   |   | This study |
| 22 | Not defined | Unk 831 | 832.4614 [M+H] <sup>+</sup>                  | C <sub>44</sub> H <sub>61</sub> N <sub>7</sub> O <sub>9</sub>   | 1.29  | 5.63 | + |   | + |   |   | + | This study |
| 23 | Not defined | Unk 758 | 759.3113 [M+H] <sup>+</sup>                  | C <sub>37</sub> H <sub>42</sub> N <sub>8</sub> O <sub>10</sub>  | 0.03  | 5.45 |   |   |   | + | + |   | This study |
| 23 | Not defined | Unk 760 | 761.3274 [M+H] <sup>+</sup>                  | C <sub>37</sub> H <sub>44</sub> N <sub>8</sub> O <sub>10</sub>  | 2.72  | 5.66 |   | + |   | + | + |   | This study |
| 24 | Not defined | Unk 410 | 393.2088 [M+H-H <sub>2</sub> O] <sup>+</sup> | C <sub>19</sub> H <sub>30</sub> N <sub>4</sub> O <sub>6</sub>   | −2.36 | 2.32 |   |   |   | + | + |   | This study |
| 24 | Not defined | Unk 477 | 478.2753 [M+H] <sup>+</sup>                  | C <sub>22</sub> H <sub>35</sub> N <sub>7</sub> O <sub>5</sub>   | −1.70 | 2.17 |   |   |   | + | + |   | This study |
| 25 | Not defined | Unk 334 | 335.1596 [M+H] <sup>+</sup>                  | C <sub>17</sub> H <sub>22</sub> N <sub>2</sub> O <sub>5</sub>   | −1.63 | 2.89 |   | + |   | + | + |   | This study |
| 25 | Not defined | Unk 366 | 349.1753 [M+H-H <sub>2</sub> O] <sup>+</sup> | C <sub>17</sub> H <sub>26</sub> N <sub>4</sub> O <sub>5</sub>   | −2.71 | 3.55 |   |   |   | + | + |   | This study |
| 26 | Not defined | Unk 516 | 534.3126 [M+NH <sub>4</sub> ] <sup>+</sup>   | C <sub>23</sub> H <sub>40</sub> N <sub>4</sub> O <sub>9</sub>   | −0.82 | 2.28 |   |   | + |   | + |   | This study |
| 26 | Not defined | Unk 560 | 578.3389 [M+NH <sub>4</sub> ] <sup>+</sup>   | C <sub>25</sub> H <sub>44</sub> N <sub>4</sub> O <sub>10</sub>  | −0.16 | 2.30 |   |   | + |   | + |   | This study |
| 26 | Not defined | Unk 604 | 622.3652 [M+NH <sub>4</sub> ] <sup>+</sup>   | C <sub>27</sub> H <sub>48</sub> N <sub>4</sub> O <sub>11</sub>  | −0.70 | 2.32 |   |   | + |   | + |   | This study |
| 27 | Not defined | Unk 946 | 947.5921 [M+H] <sup>+</sup>                  | C <sub>46</sub> H <sub>78</sub> N <sub>10</sub> O <sub>11</sub> | −0.34 | 6.20 | + | + |   |   |   |   | This study |
| 27 | Not defined | Unk 960 | 961.6081 [M+H] <sup>+</sup>                  | C <sub>47</sub> H <sub>80</sub> N <sub>10</sub> O <sub>11</sub> | 0.07  | 6.29 | + | + |   |   |   |   | This study |
| 27 | Not defined | Unk 974 | 975.6237 [M+H] <sup>+</sup>                  | C <sub>48</sub> H <sub>82</sub> N <sub>10</sub> O <sub>11</sub> | 0.05  | 6.32 |   | + |   |   |   |   | This study |

Abbreviations: Ac; aerucyclamide, Ag; aeruginosamide, As; aeruginosin, AP; anabaenopeptin, Cyp; cyanopeptolin, Dha; dehydroalanine, FA; ferri-toxic acid, Lxx; leucine or isoleucine, MC; microcystin, Md; microcyclamide, Mg; microginin, Mv; microviridin, NP; Nosptopeptin, Unk; unknown.

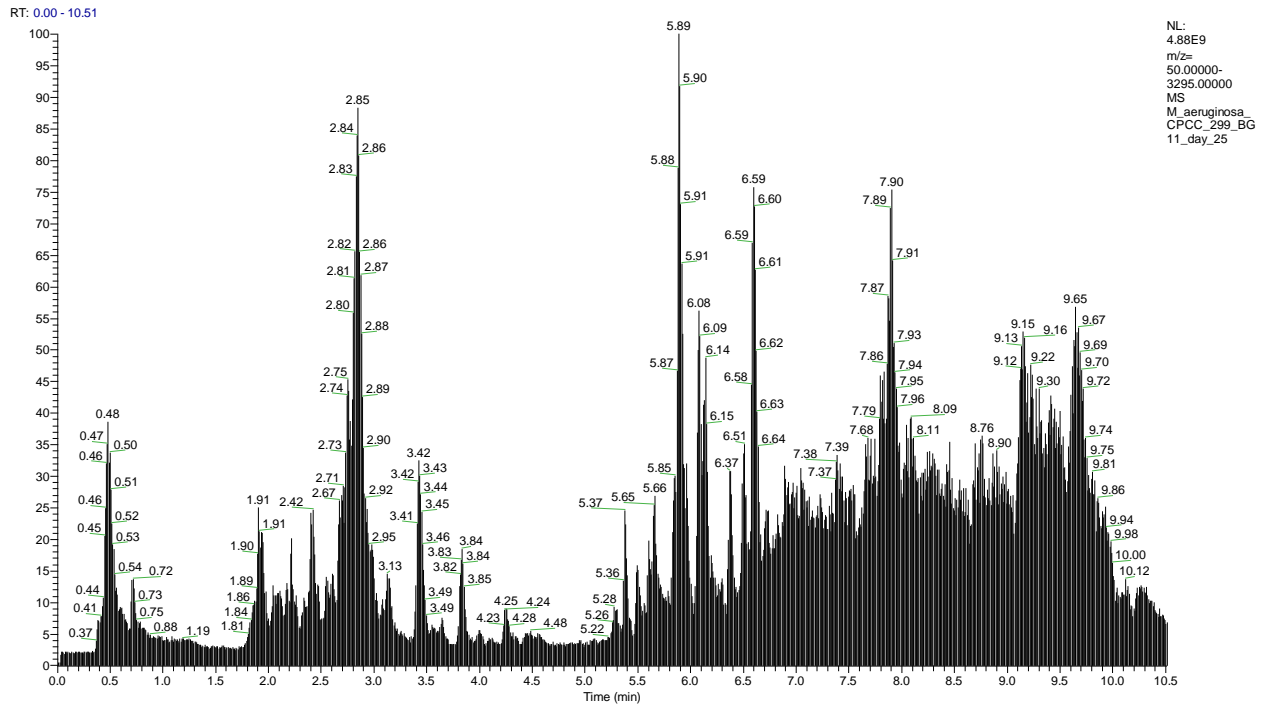

Figure S1. LC-MS spectrum for *M. aeruginosa* CPCC 299 grown in BG-11 medium for 25 days.

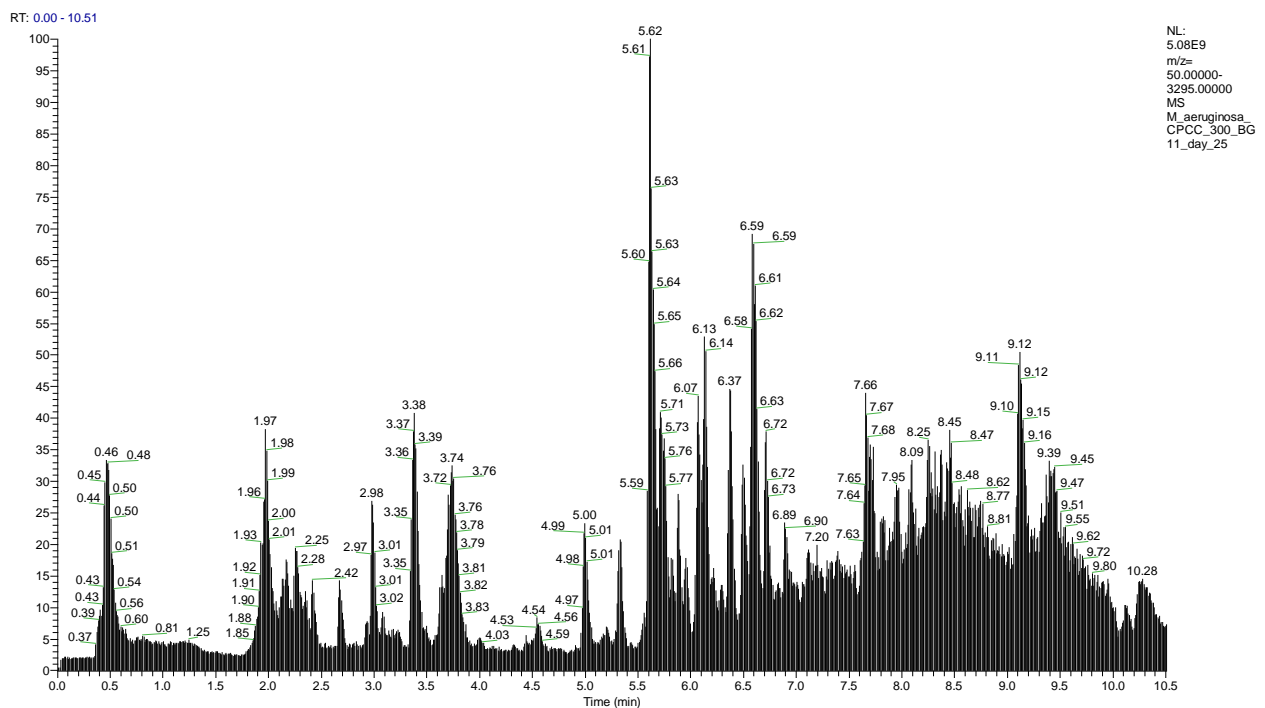

Figure S2. LC-MS spectrum for *M. aeruginosa* CPCC 300 grown in BG-11 medium for 25 days.

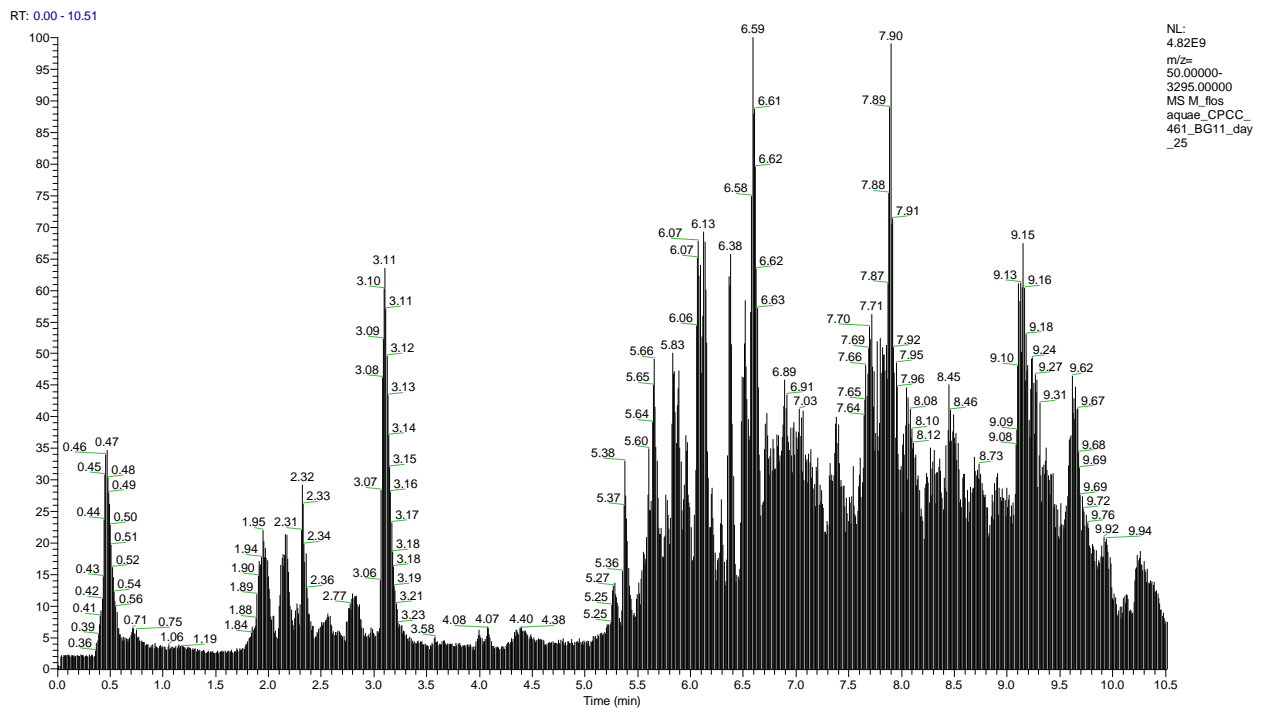

Figure S3. LC-MS spectrum for *M. flos-aquae* CPCC 461 grown in BG-11 medium for 25 days.

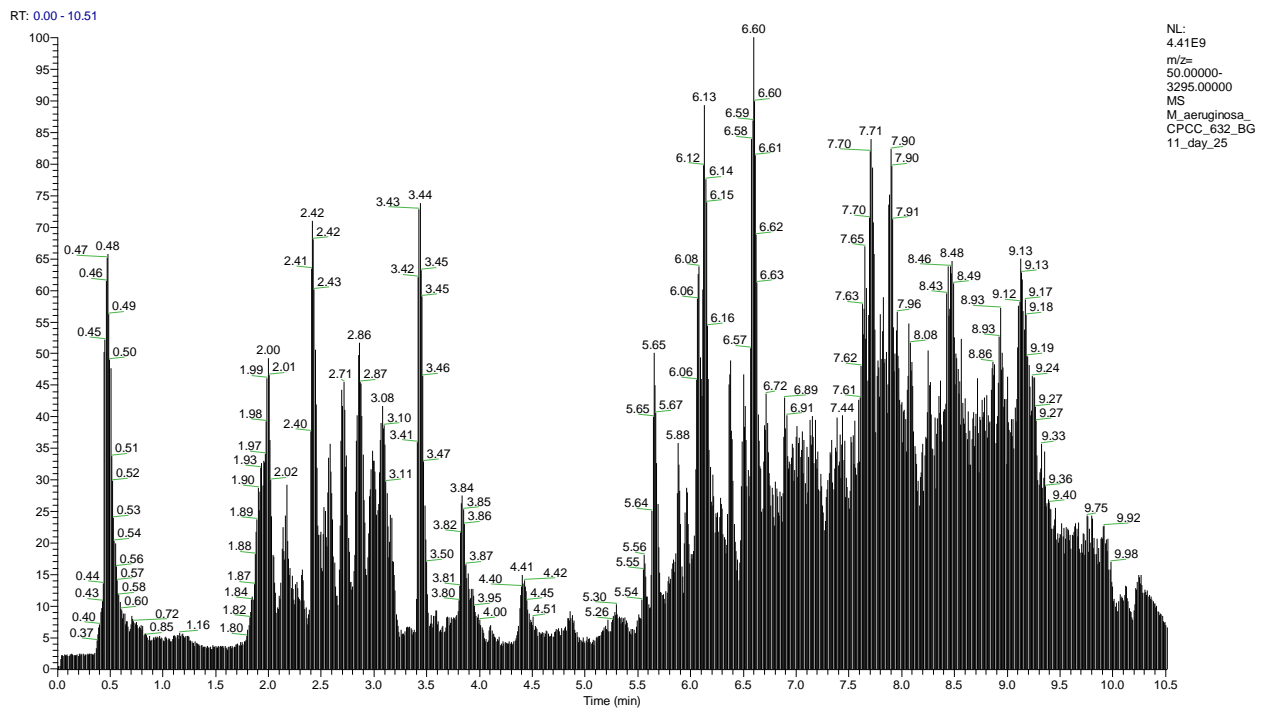

Figure S4. LC-MS spectrum for *M. aeruginosa* CPCC 632 grown in BG-11 medium for 25 days.



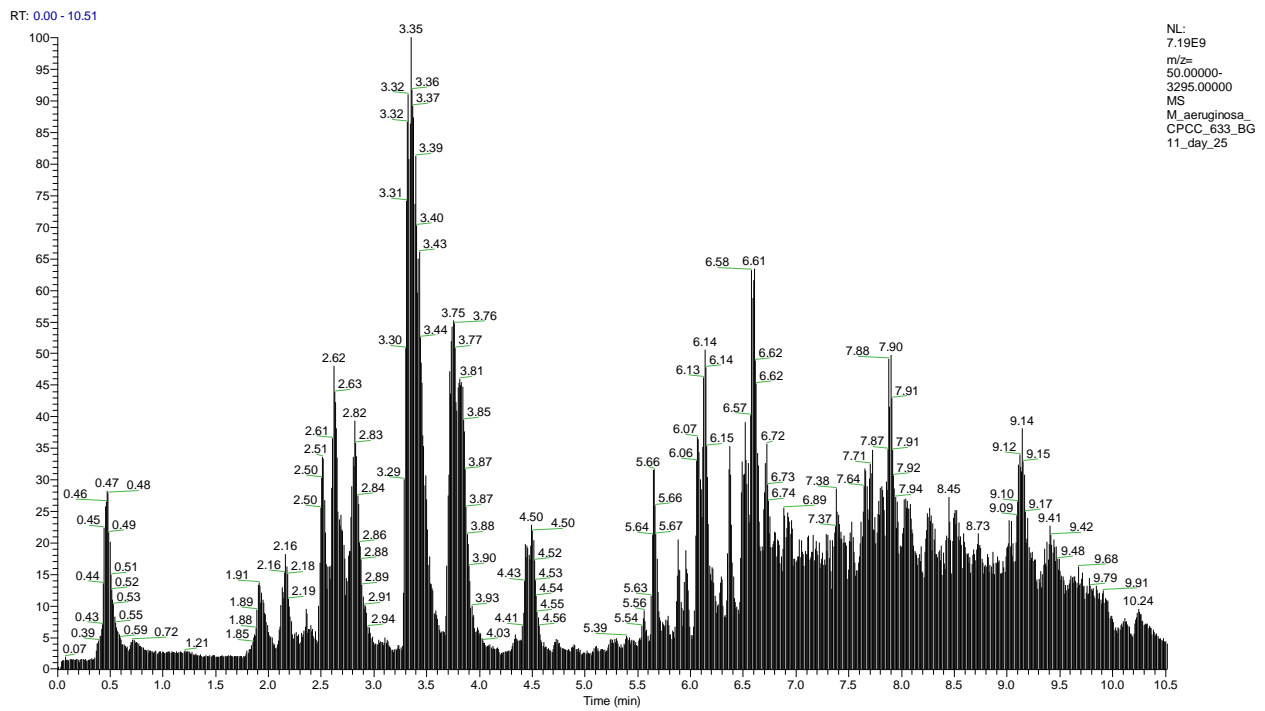

Figure S5. LC-MS spectrum for *M. aeruginosa* CPCC 633 grown in BG-11 medium for 25 days.

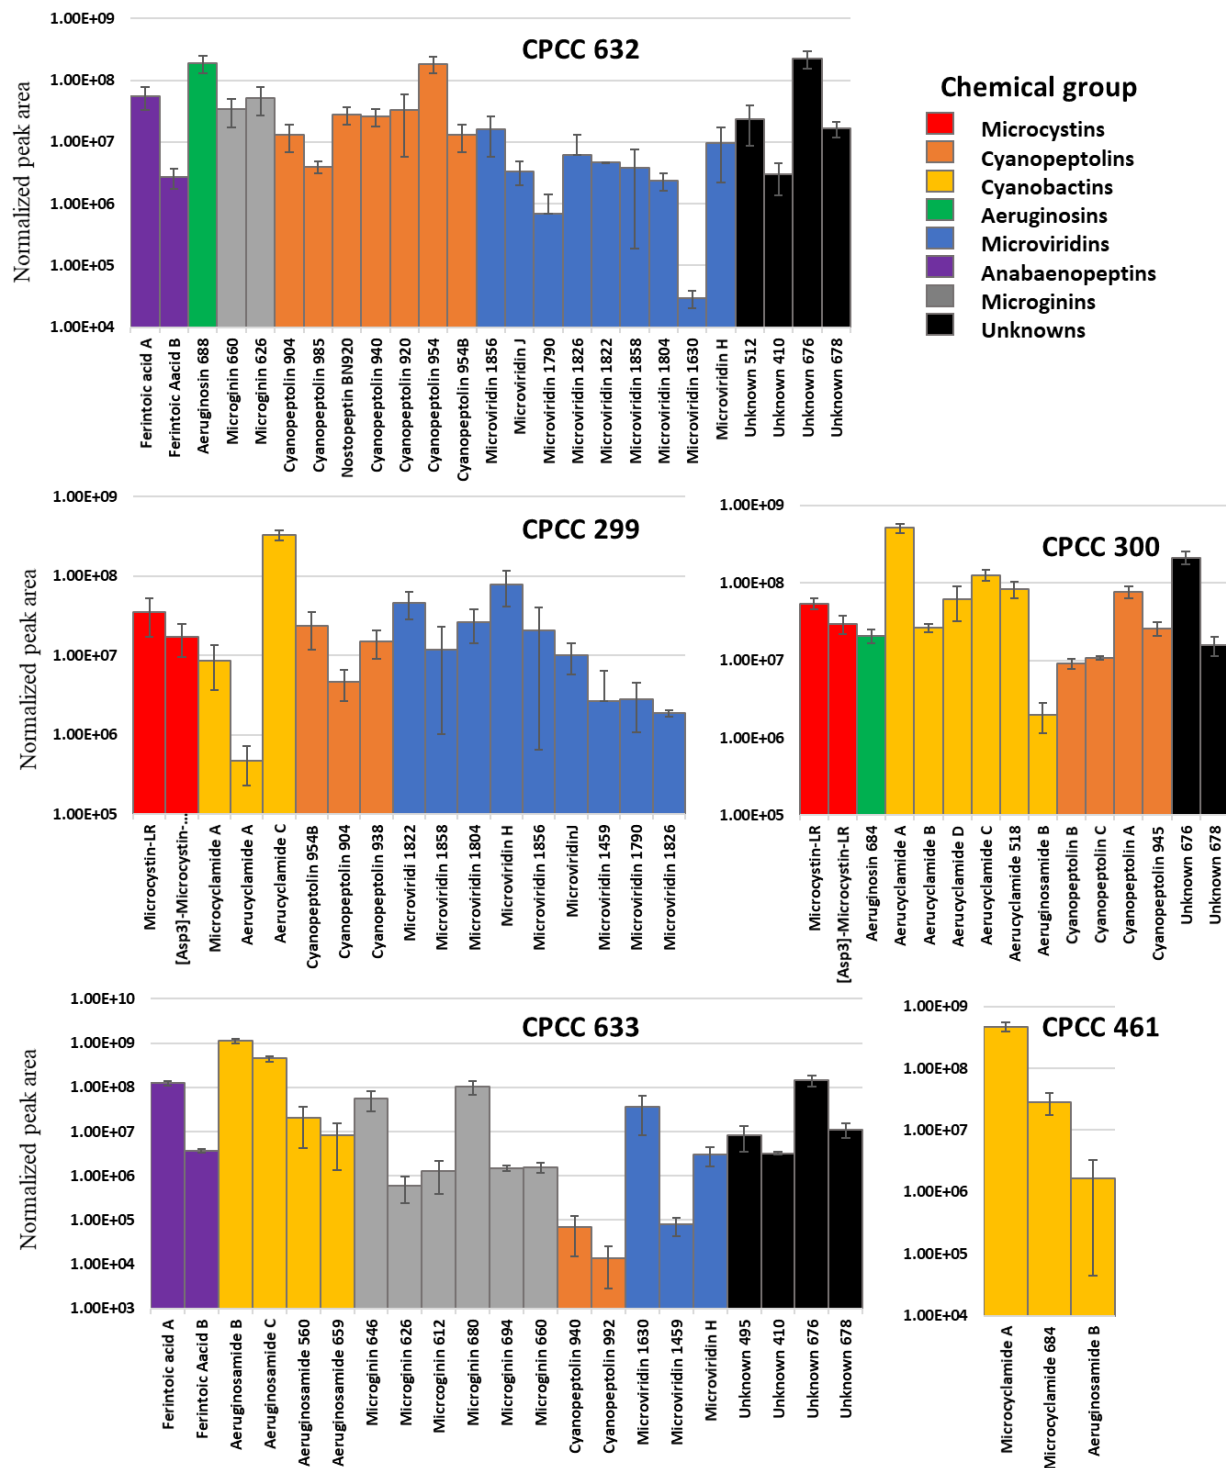

**Figure S6.** Normalized relative abundance (peak area/dry cell mass) of dominant cyanopeptides produced by five studied *Microcystis* strains included in the GNPS analysis.
